# Supplementary material for: Life-threatening viral disease in a novel form of autosomal recessive IFNAR2 deficiency in the Arctic
Source: PubMed Central journal article supplement (PMC9026249; doi:10.1084/jem.20212427), 2022-04-20

Source data: Figure S3A

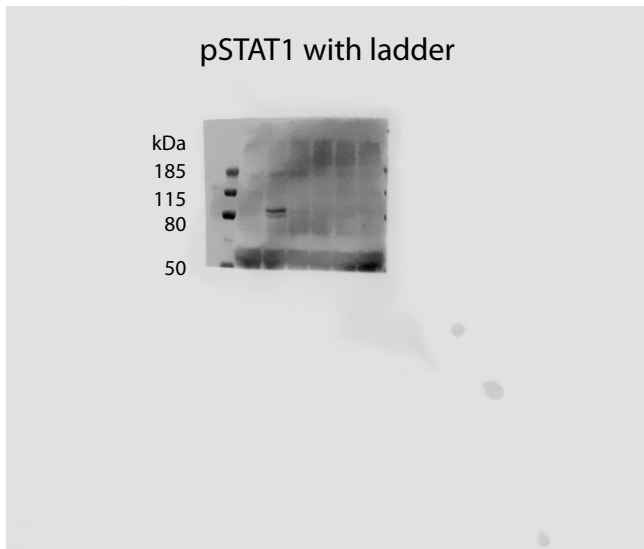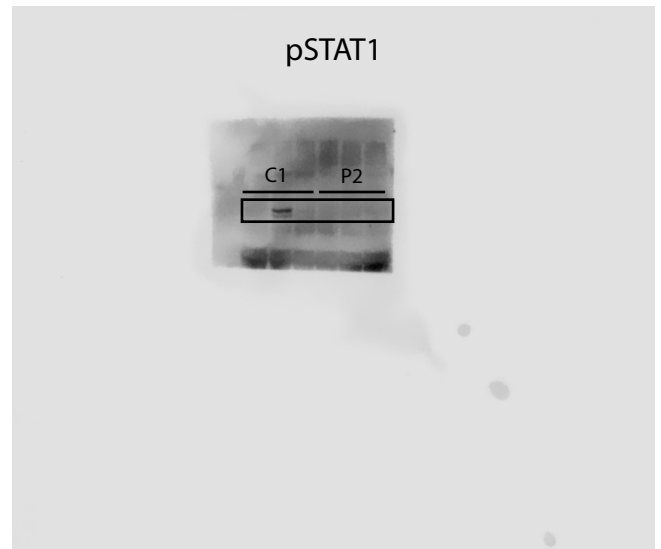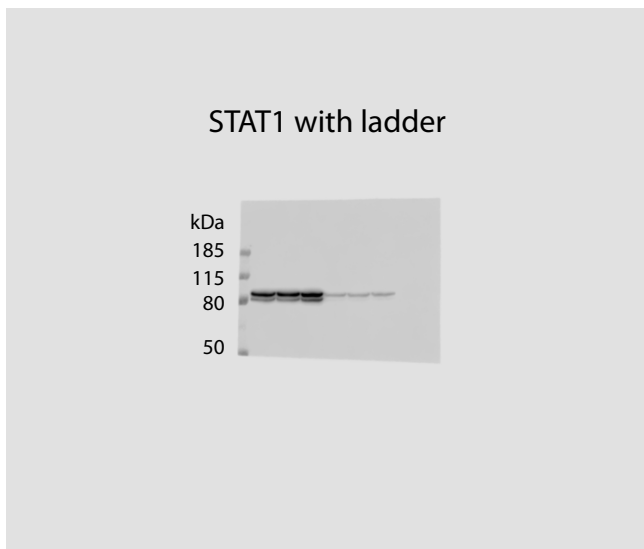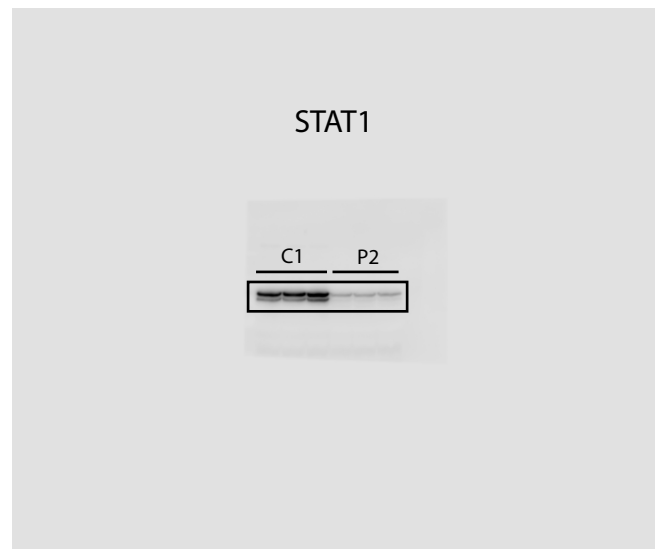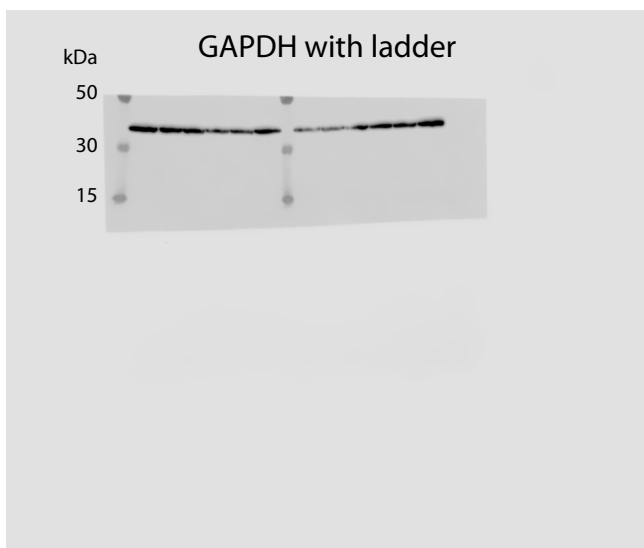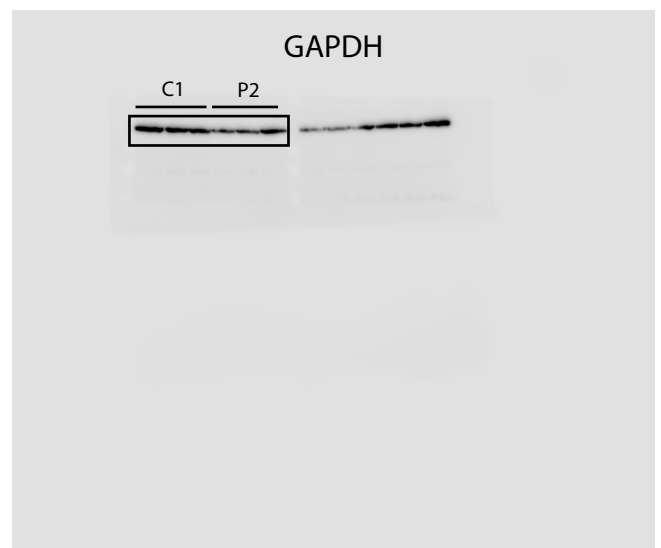

Source data: Figure S3C

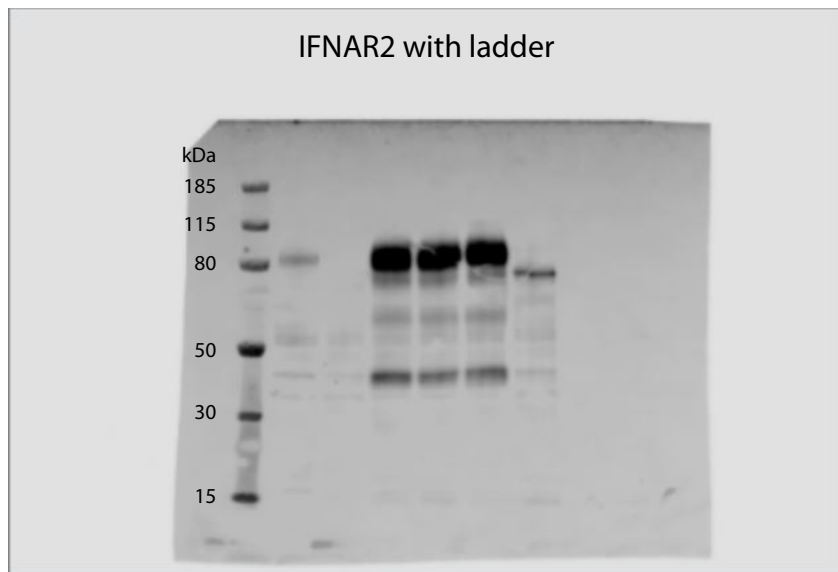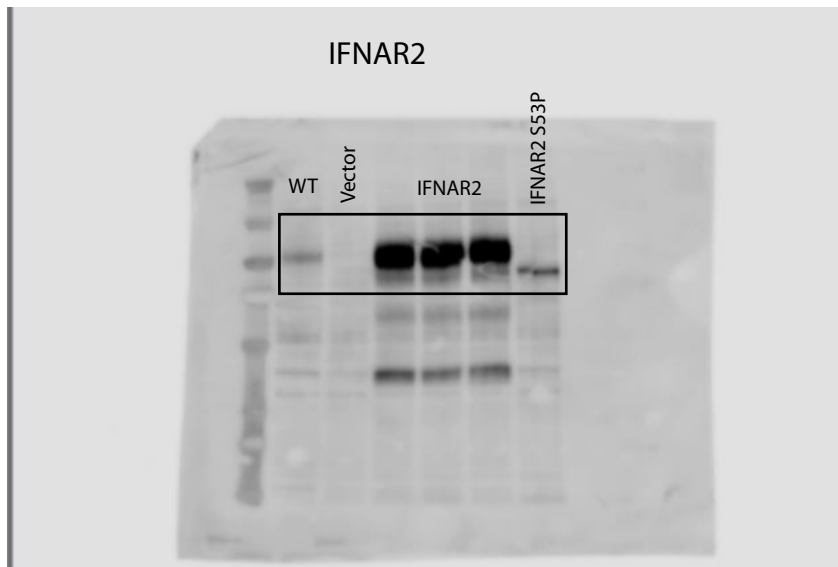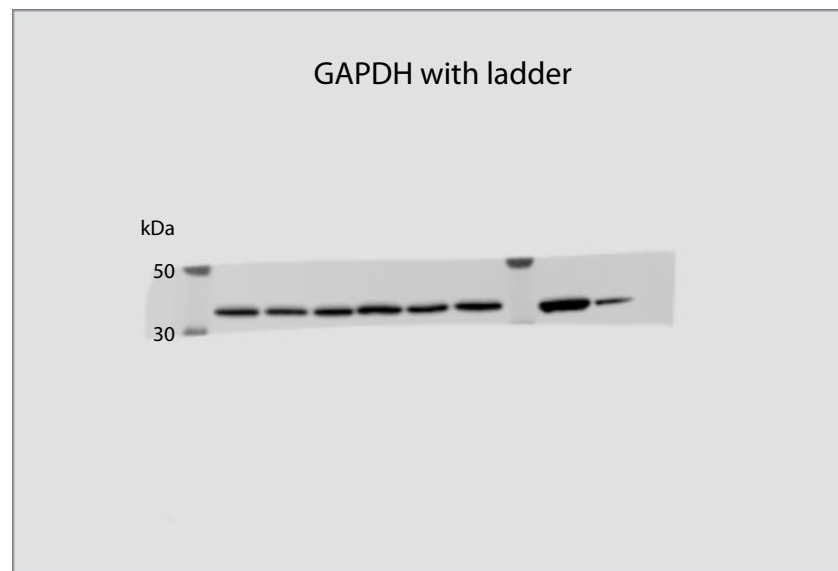

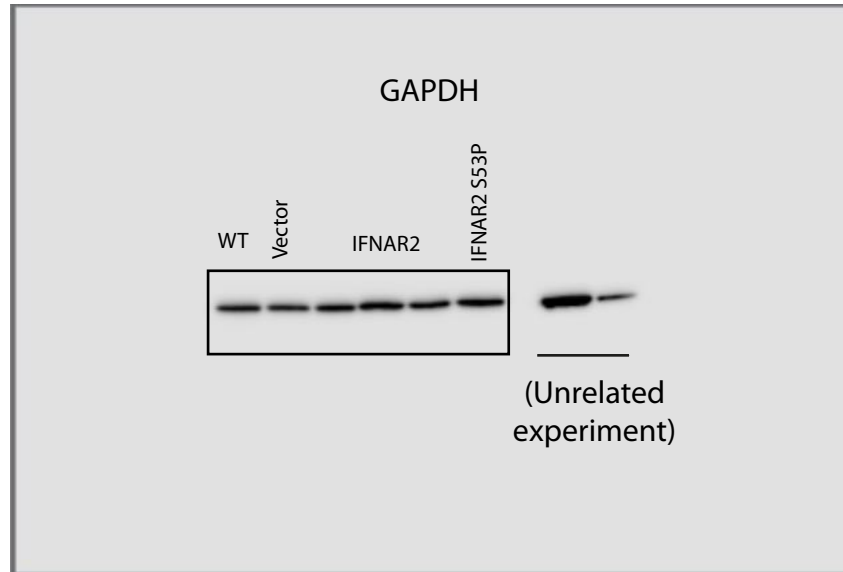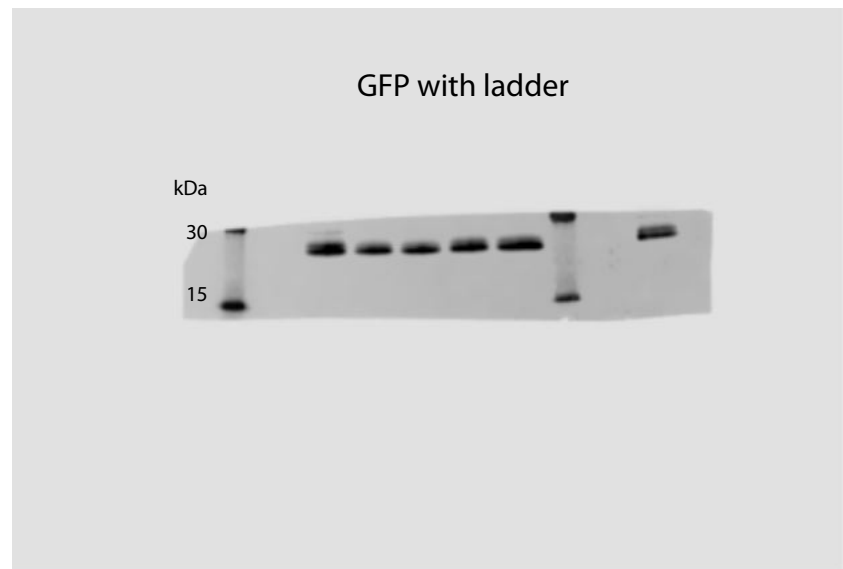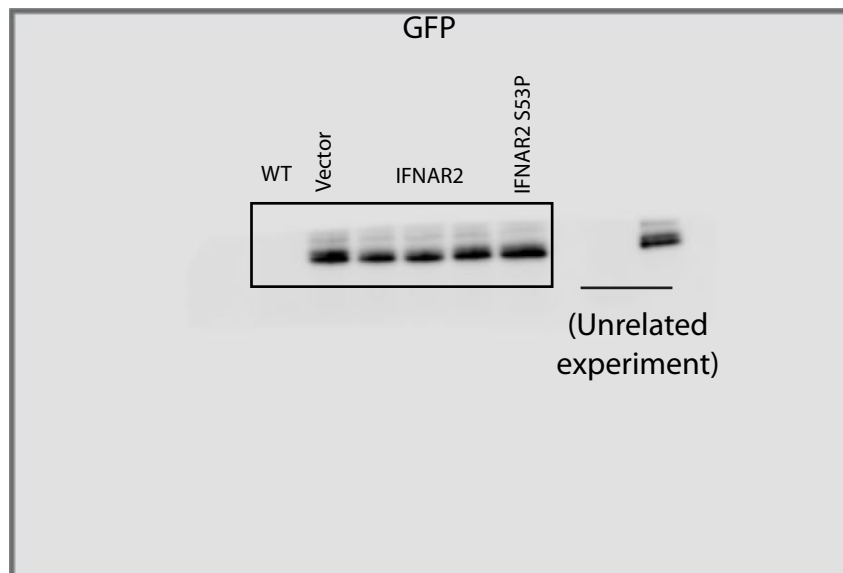

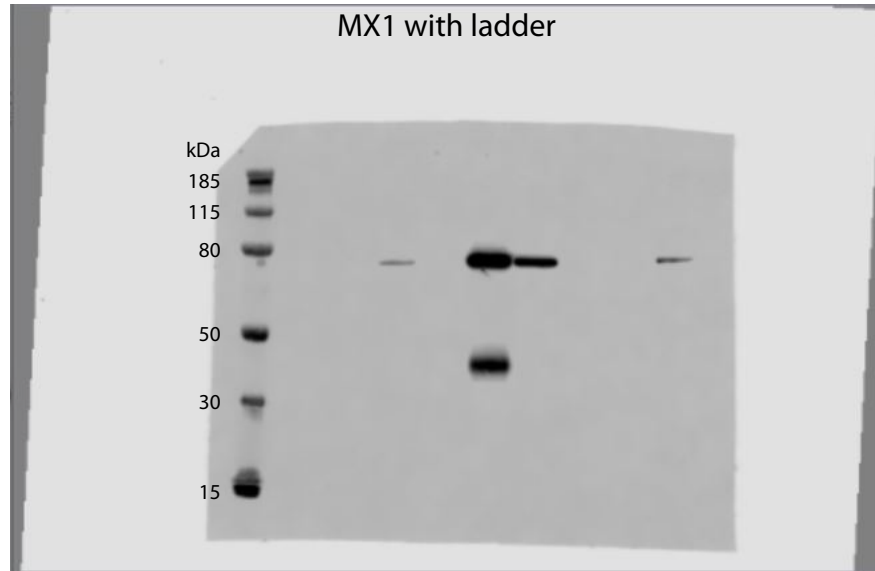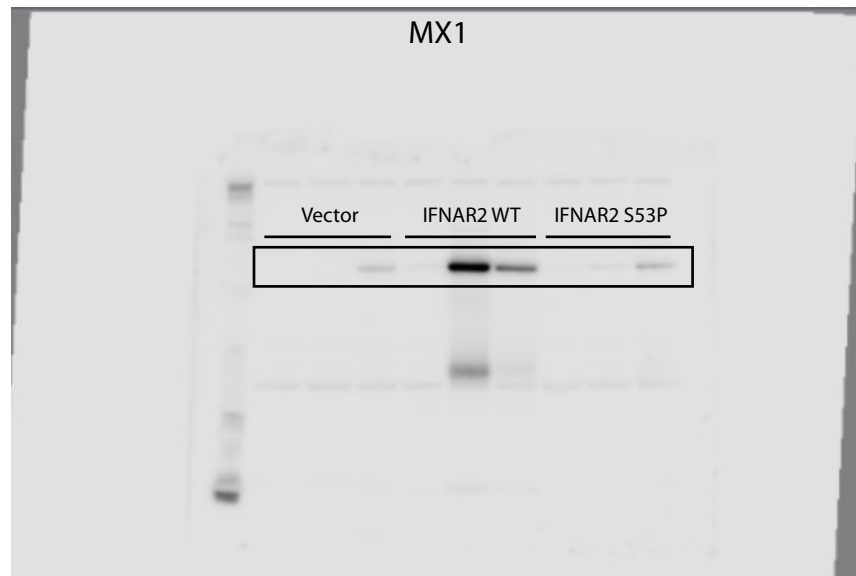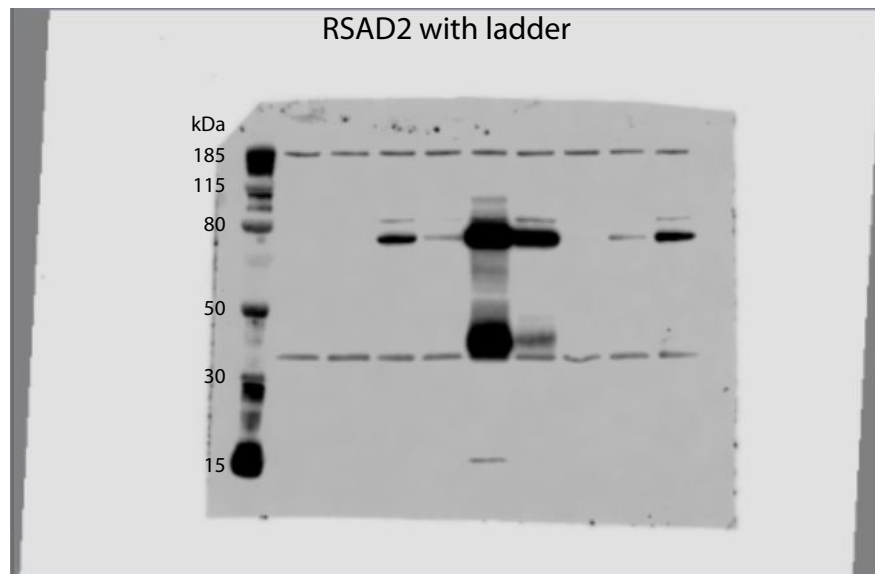

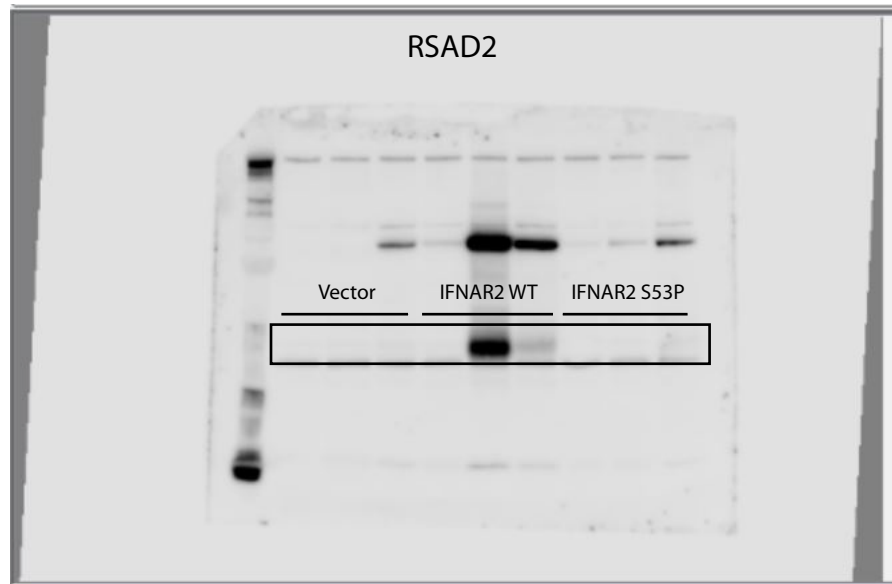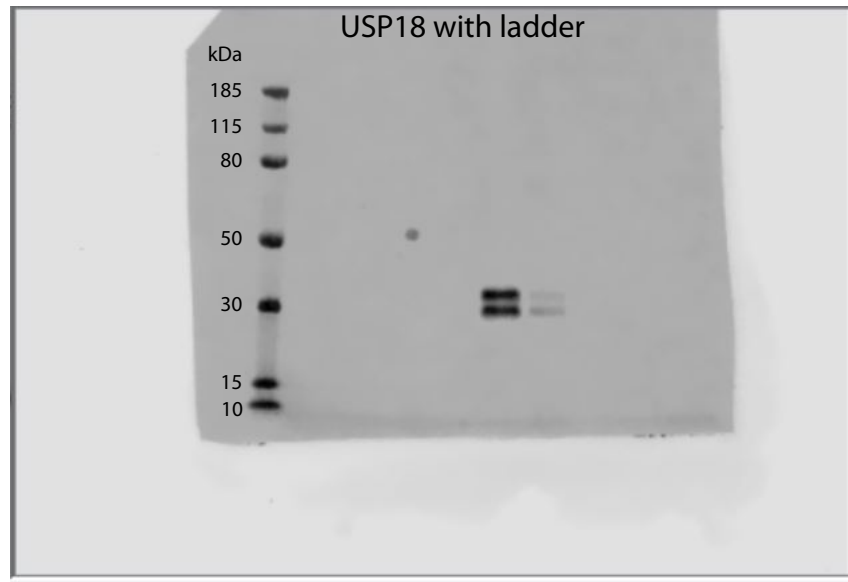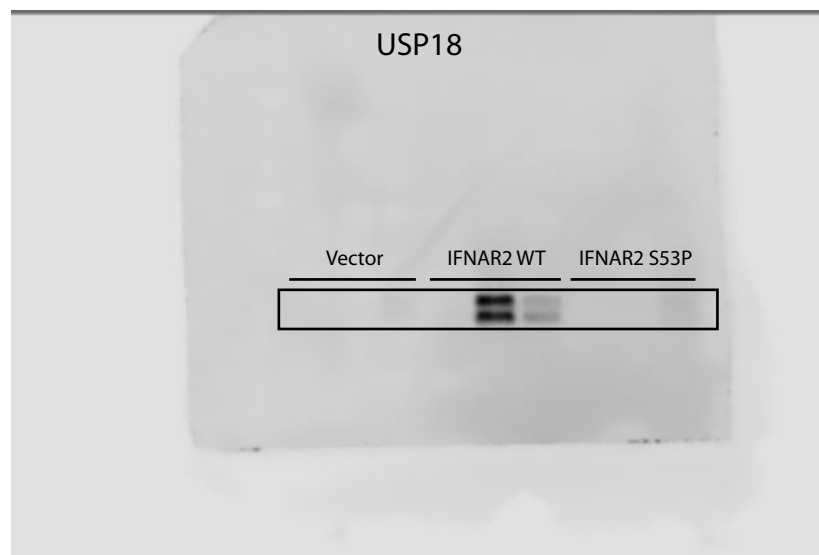

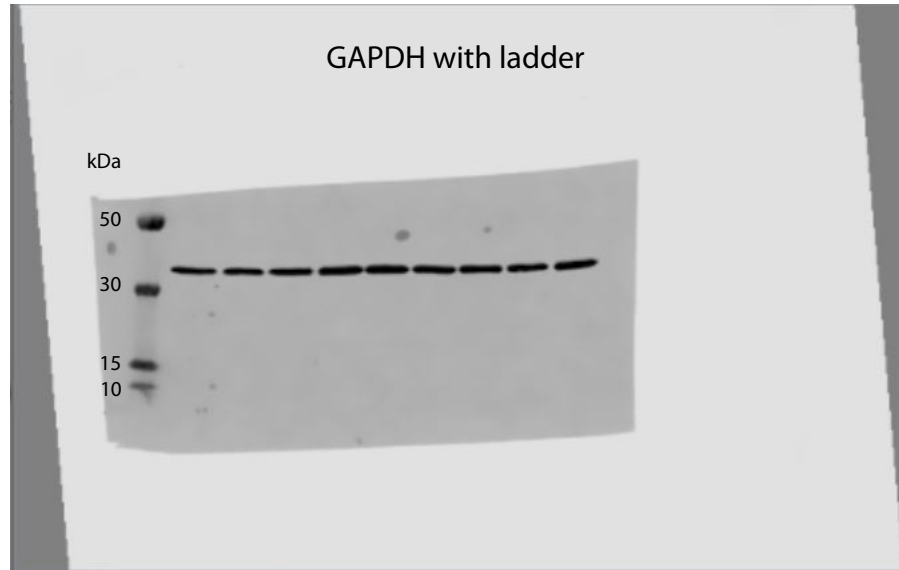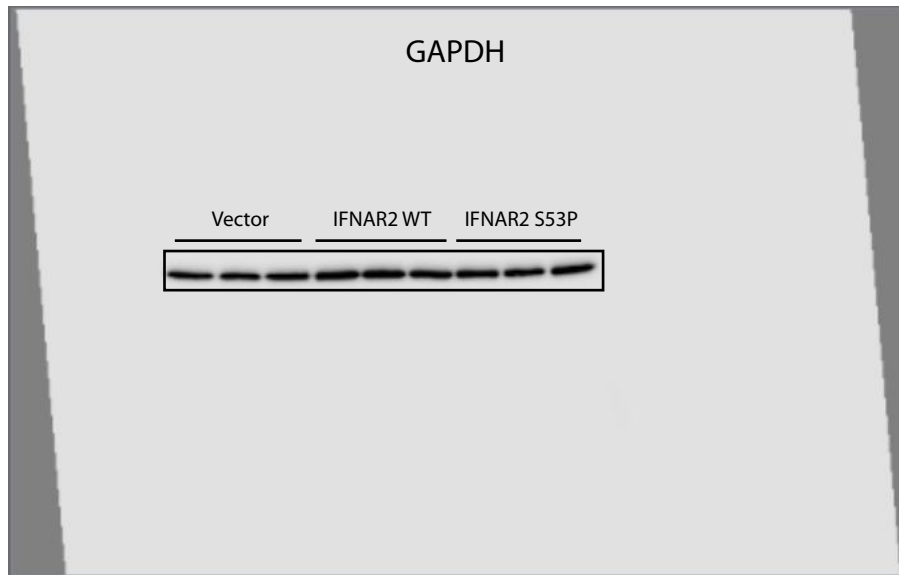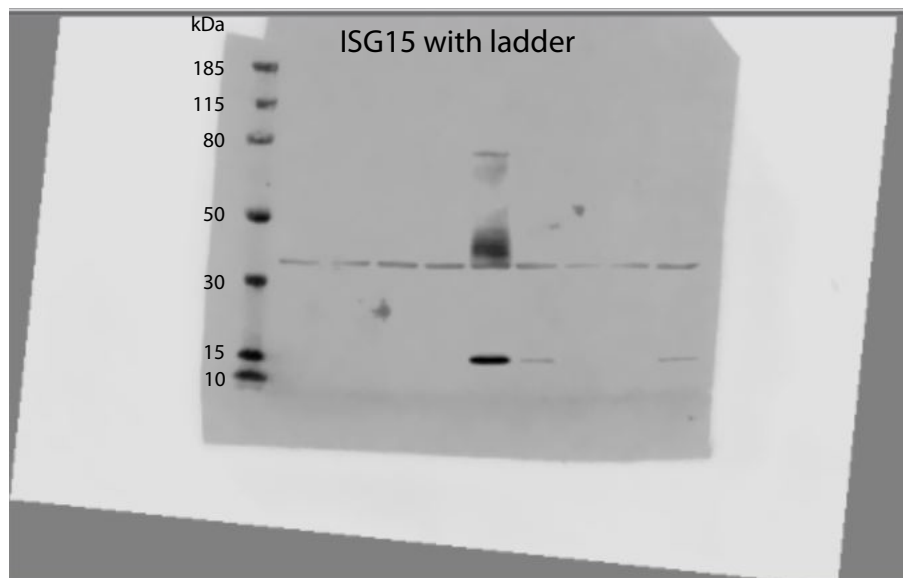

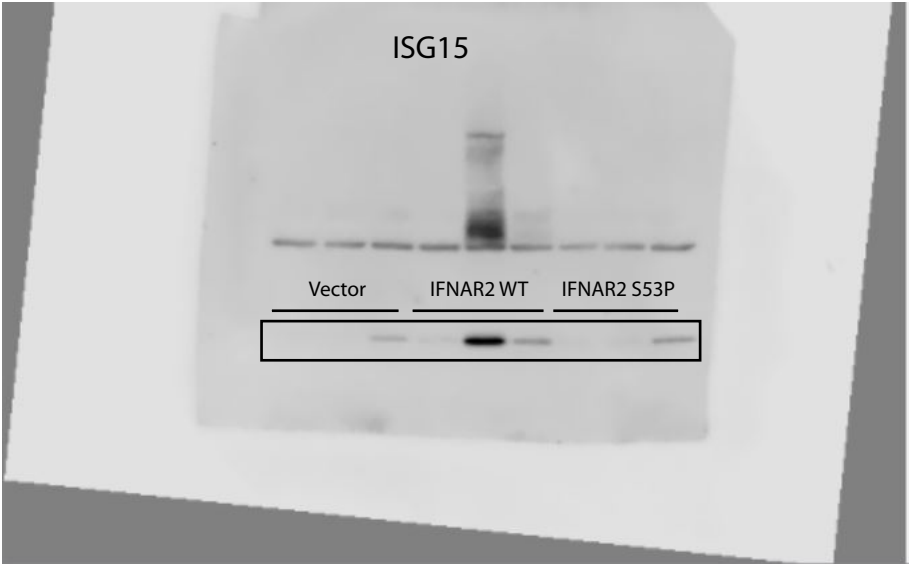

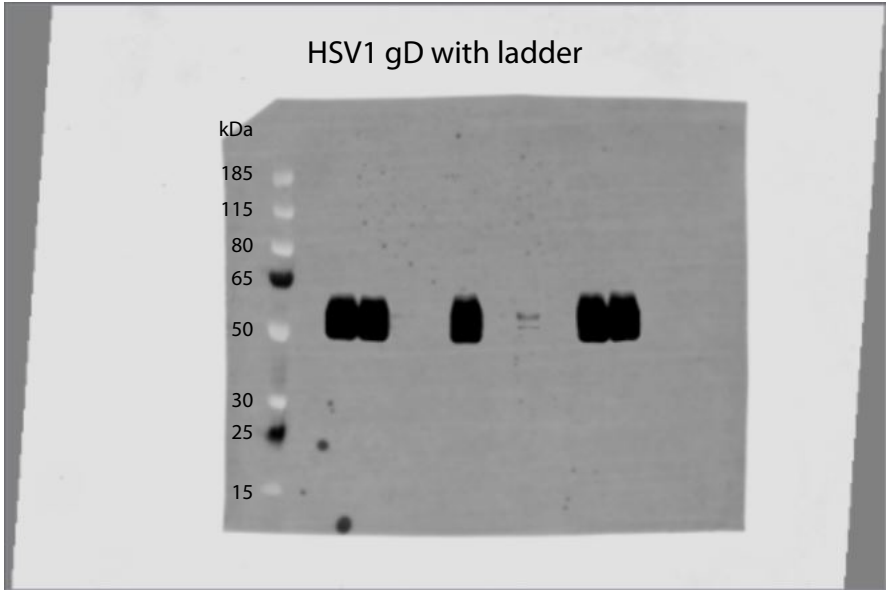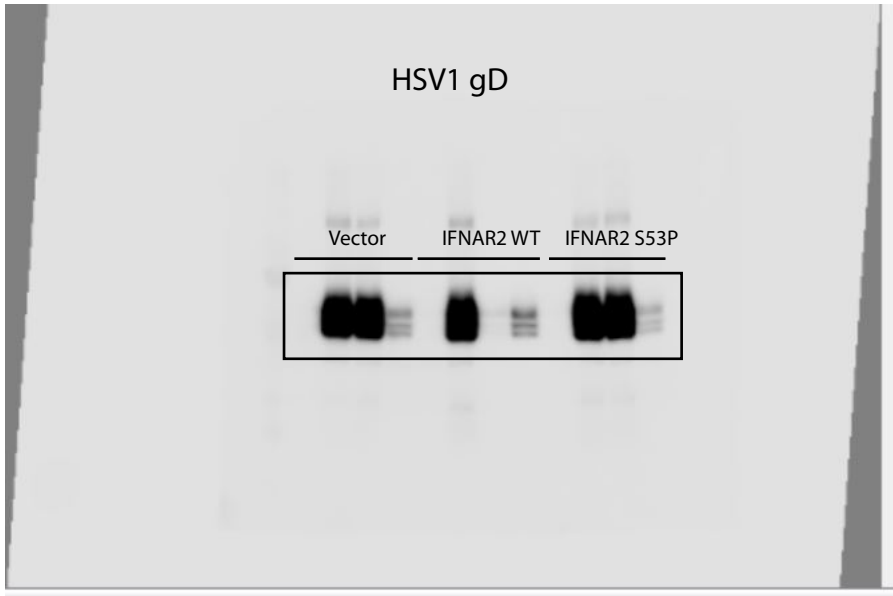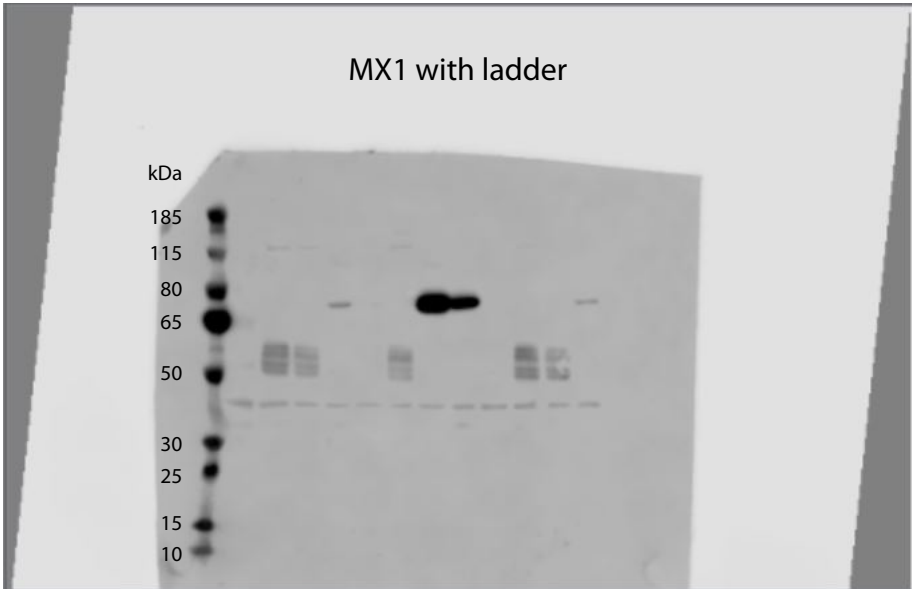



Source data: Figure S3E

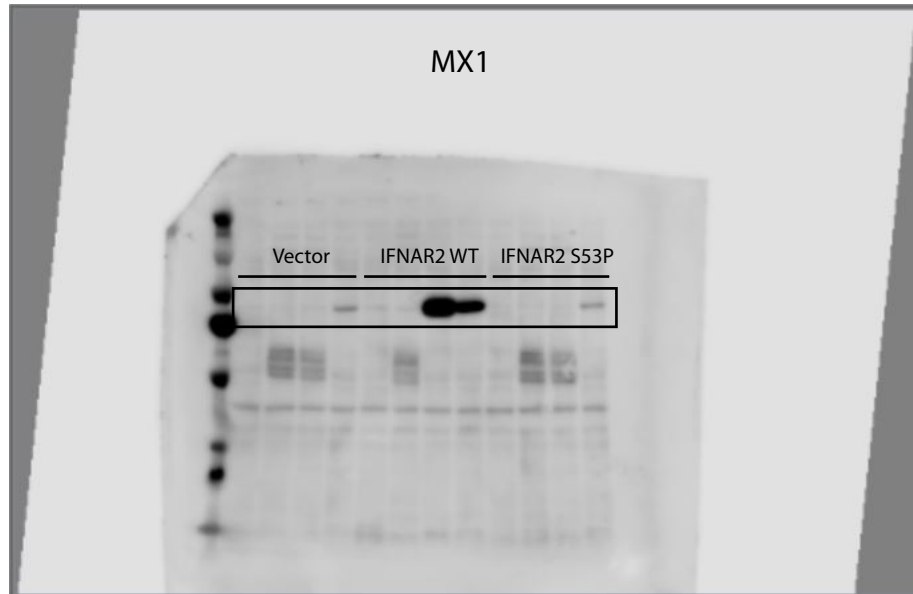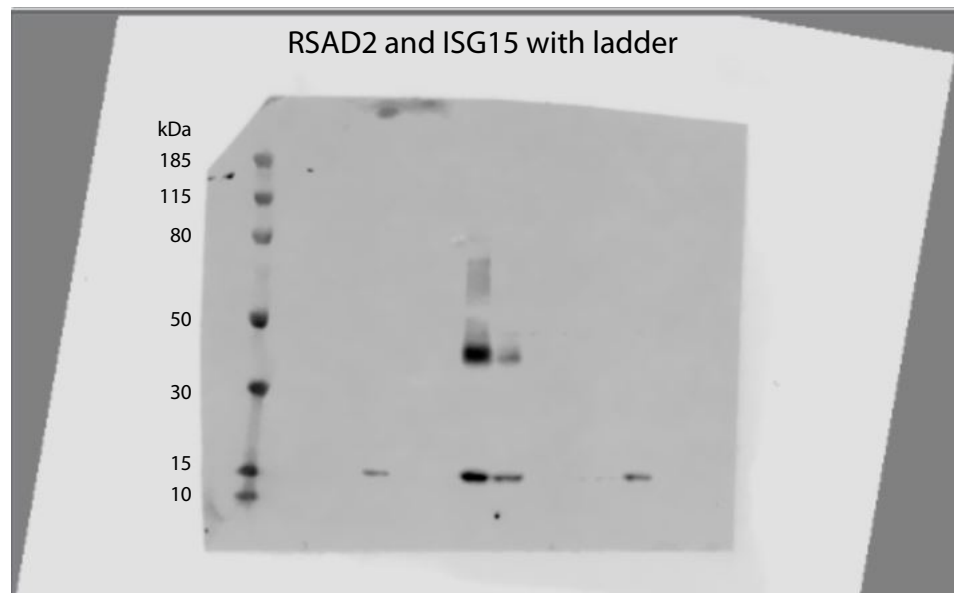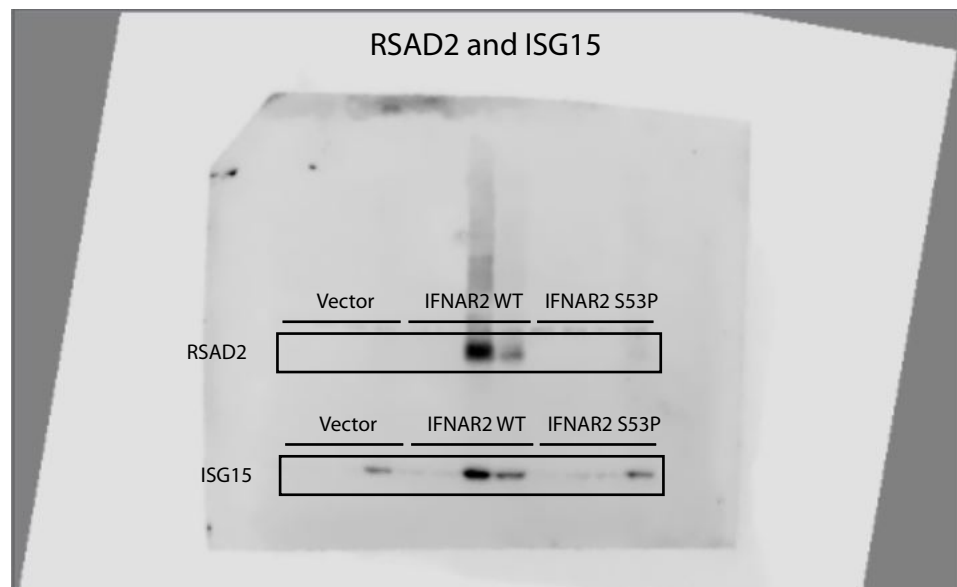

Source data: Figure S3E

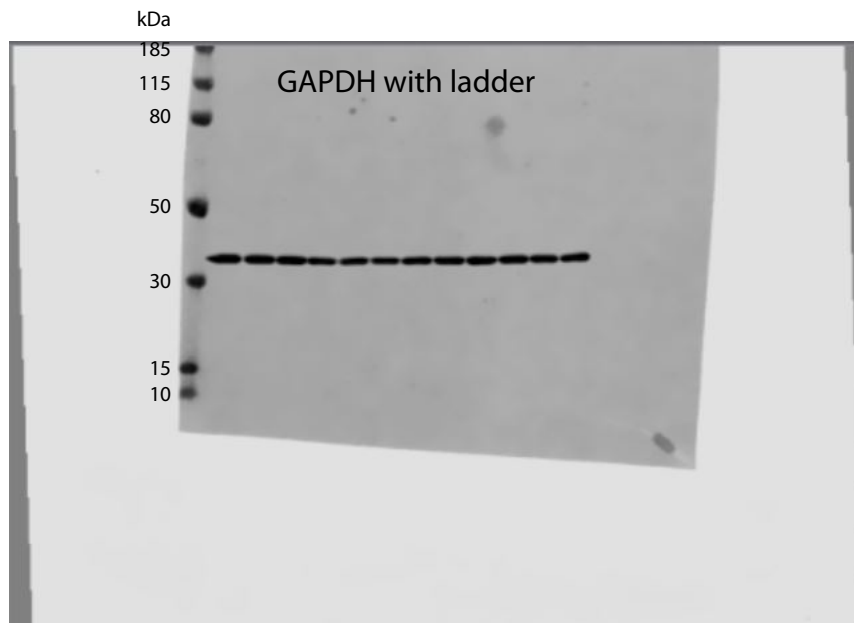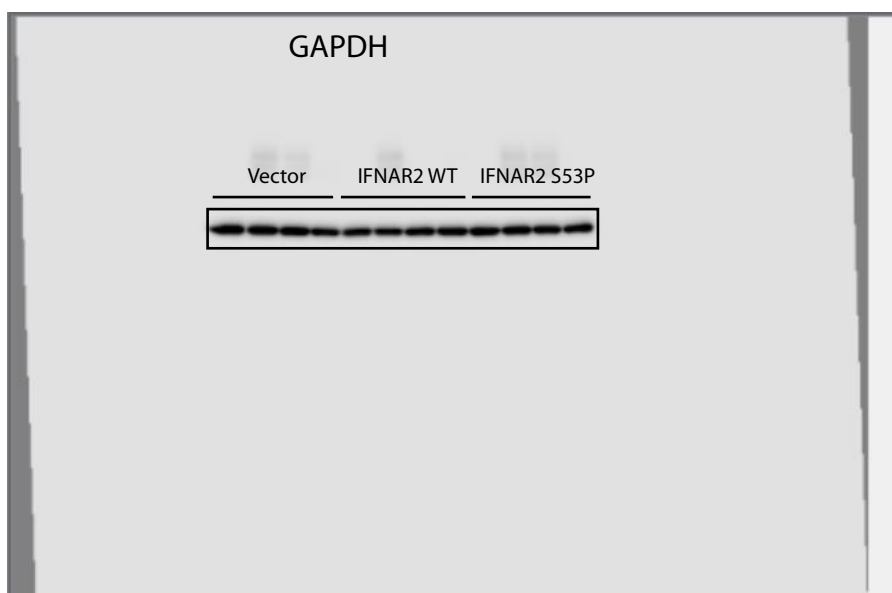

Supplement: JEM_20212427_SourceDataFS3.pdf [file JEM_20212427_SourceDataFS3.pdf]
