# Supplementary material for: Life-threatening viral disease in a novel form of autosomal recessive IFNAR2 deficiency in the Arctic
Source: PubMed Central journal article supplement (PMC9026249; doi:10.1084/jem.20212427), 2022-04-20

Source data: Figure 3B

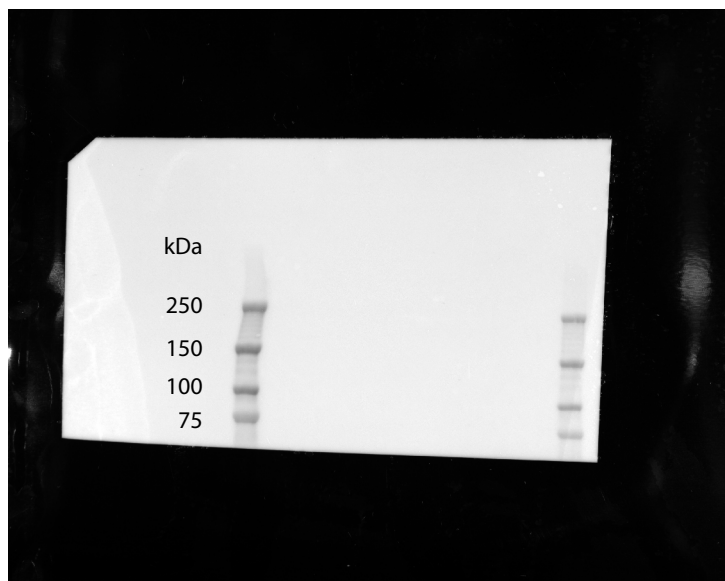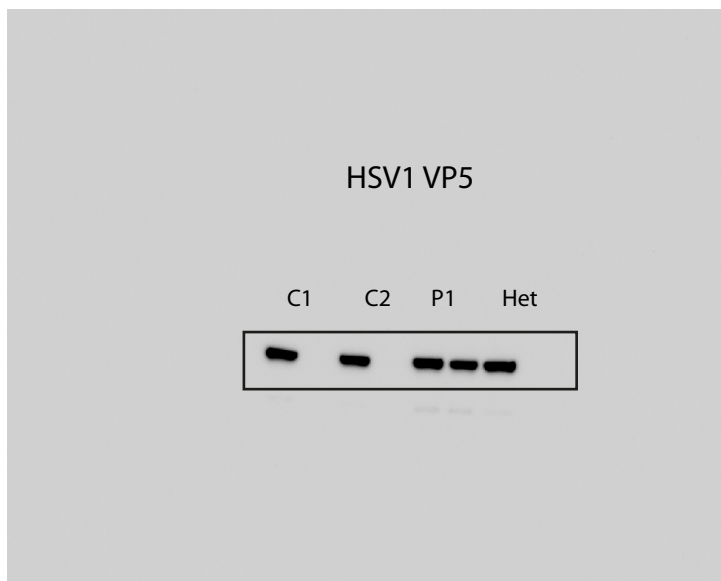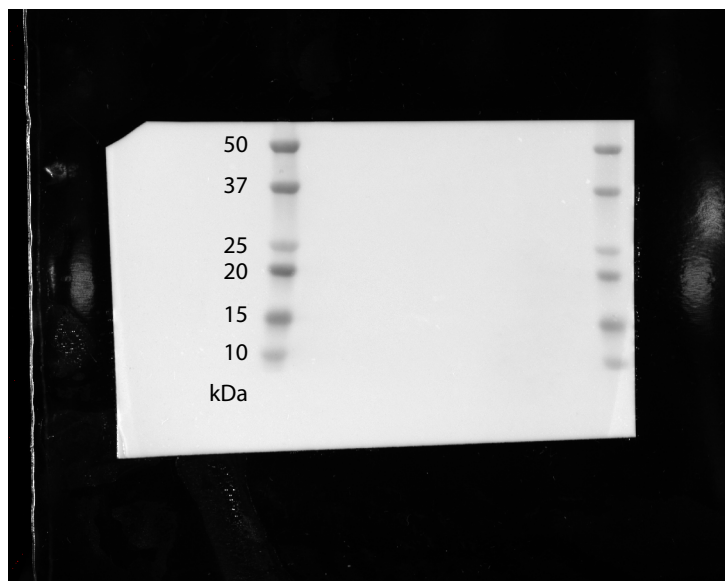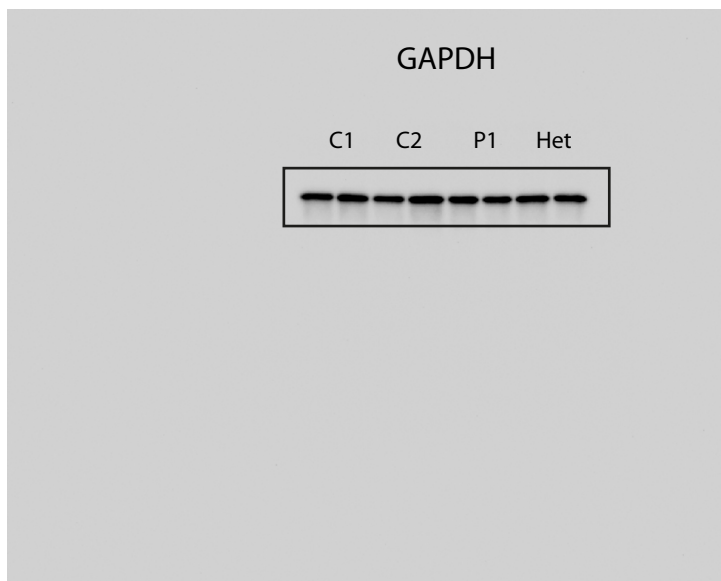

Source data: Figure 3F

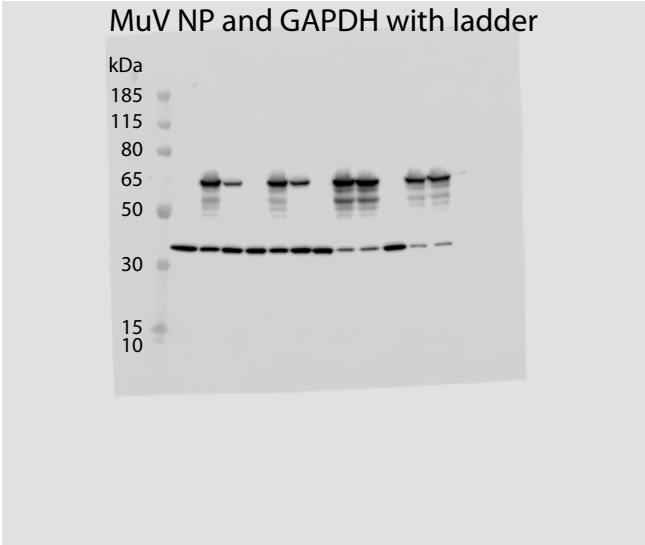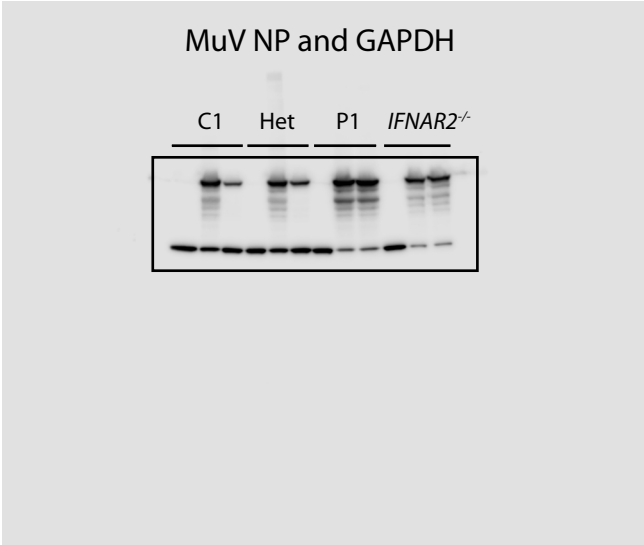

Supplement: JEM_20212427_SourceDataF3.pdf [file JEM_20212427_SourceDataF3.pdf]
